# Supplementary material for: Exploiting angled thin film vortex microfluidics for expeditious syntheses of iminosugars
Source: Royal Society of Chemistry journal article supplement (doi:10.1039/d2ra04409a), 2022-01-01

## **Exploiting angled thin film vortex microfluidics for expeditious syntheses of iminosugars**

Jeremy Duczynski,<sup>a</sup> Colin L. Raston<sup>b</sup> and Keith A. Stubbs<sup>a\*</sup>

*<sup>a</sup>School of Molecular Sciences, The University of Western Australia, Crawley, WA,  
6009, Australia.*

*E-mail: keith.stubbs@uwa.edu.au*

*<sup>b</sup>Flinders Institute for Nanoscale Science and Technology, College of Science and  
Engineering, Flinders University, Bedford Park, SA, 5042,  
Australia.*

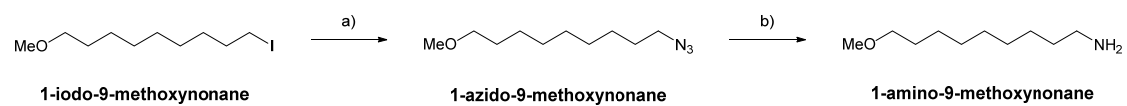

**Supporting Scheme 1.** a)  $\text{NaN}_3$ , acetone: $\text{H}_2\text{O}$  (3:1) (88%); b)  $\text{Pd}(\text{OH})_2/\text{C}$ , EtOH (92%).

# <sup>1</sup>H NMR spectrum of Compound 12

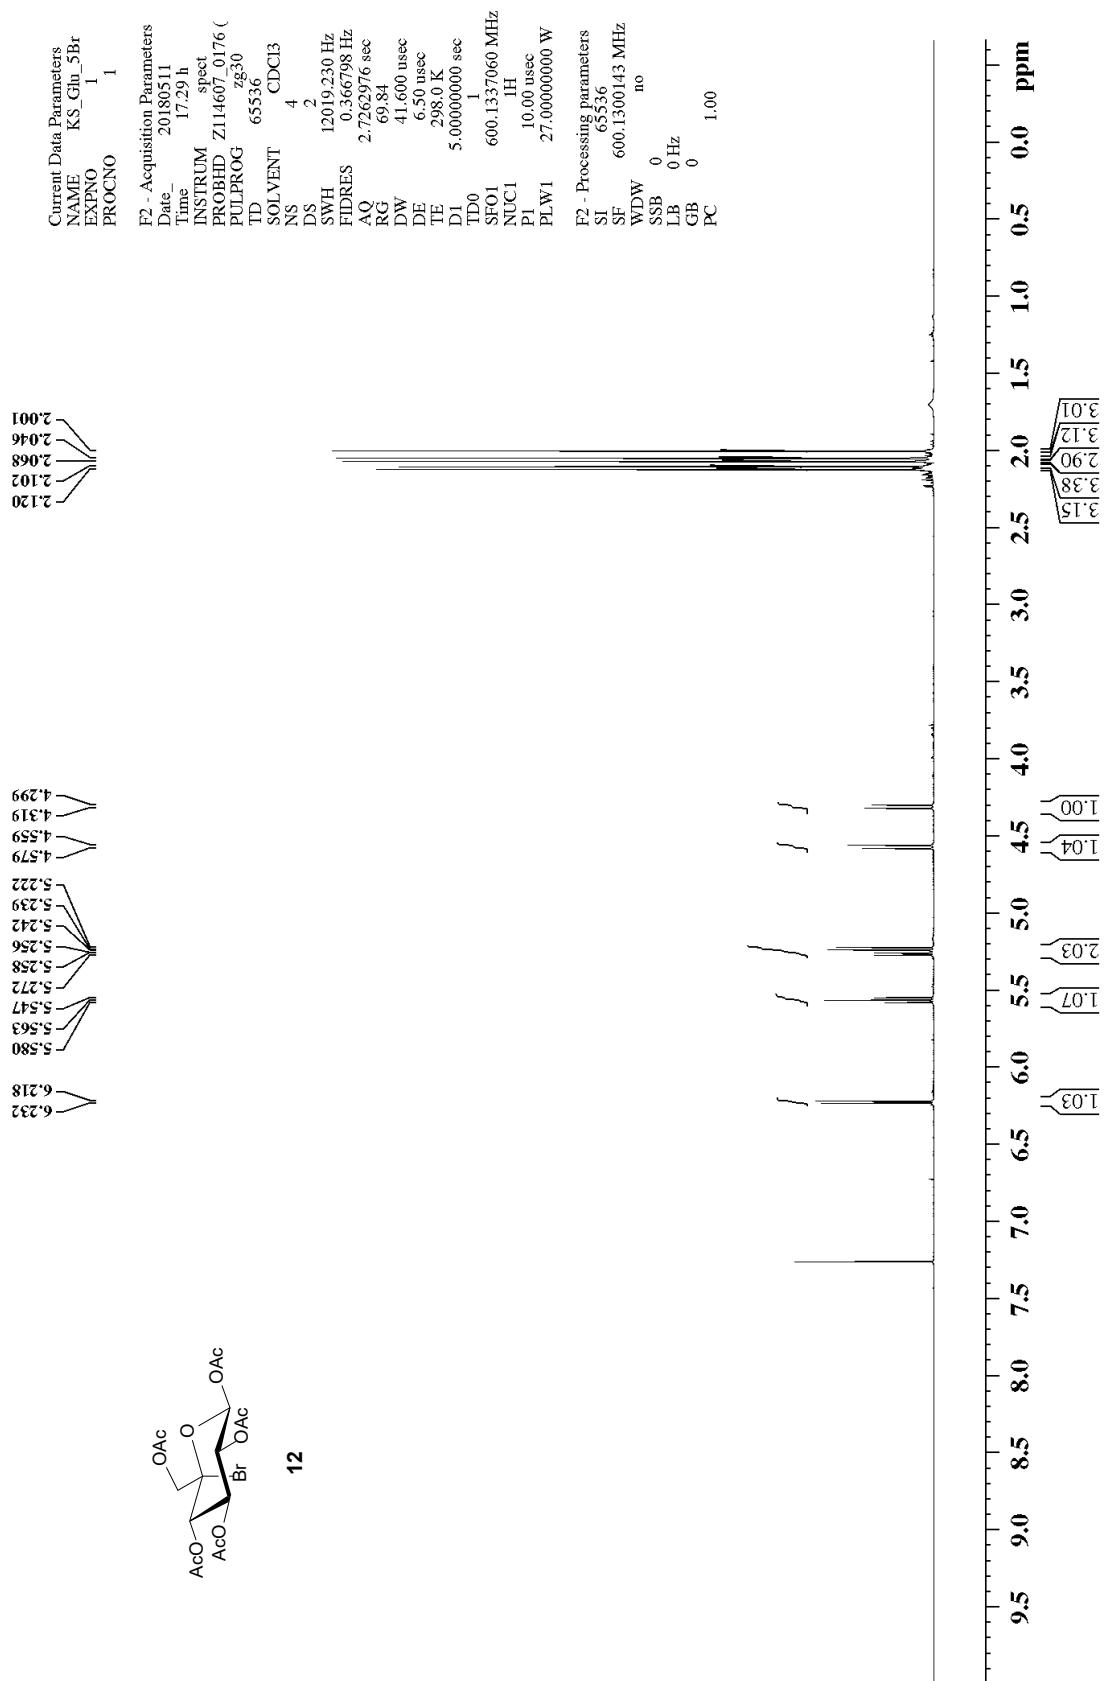

# <sup>13</sup>C NMR spectrum of Compound 12

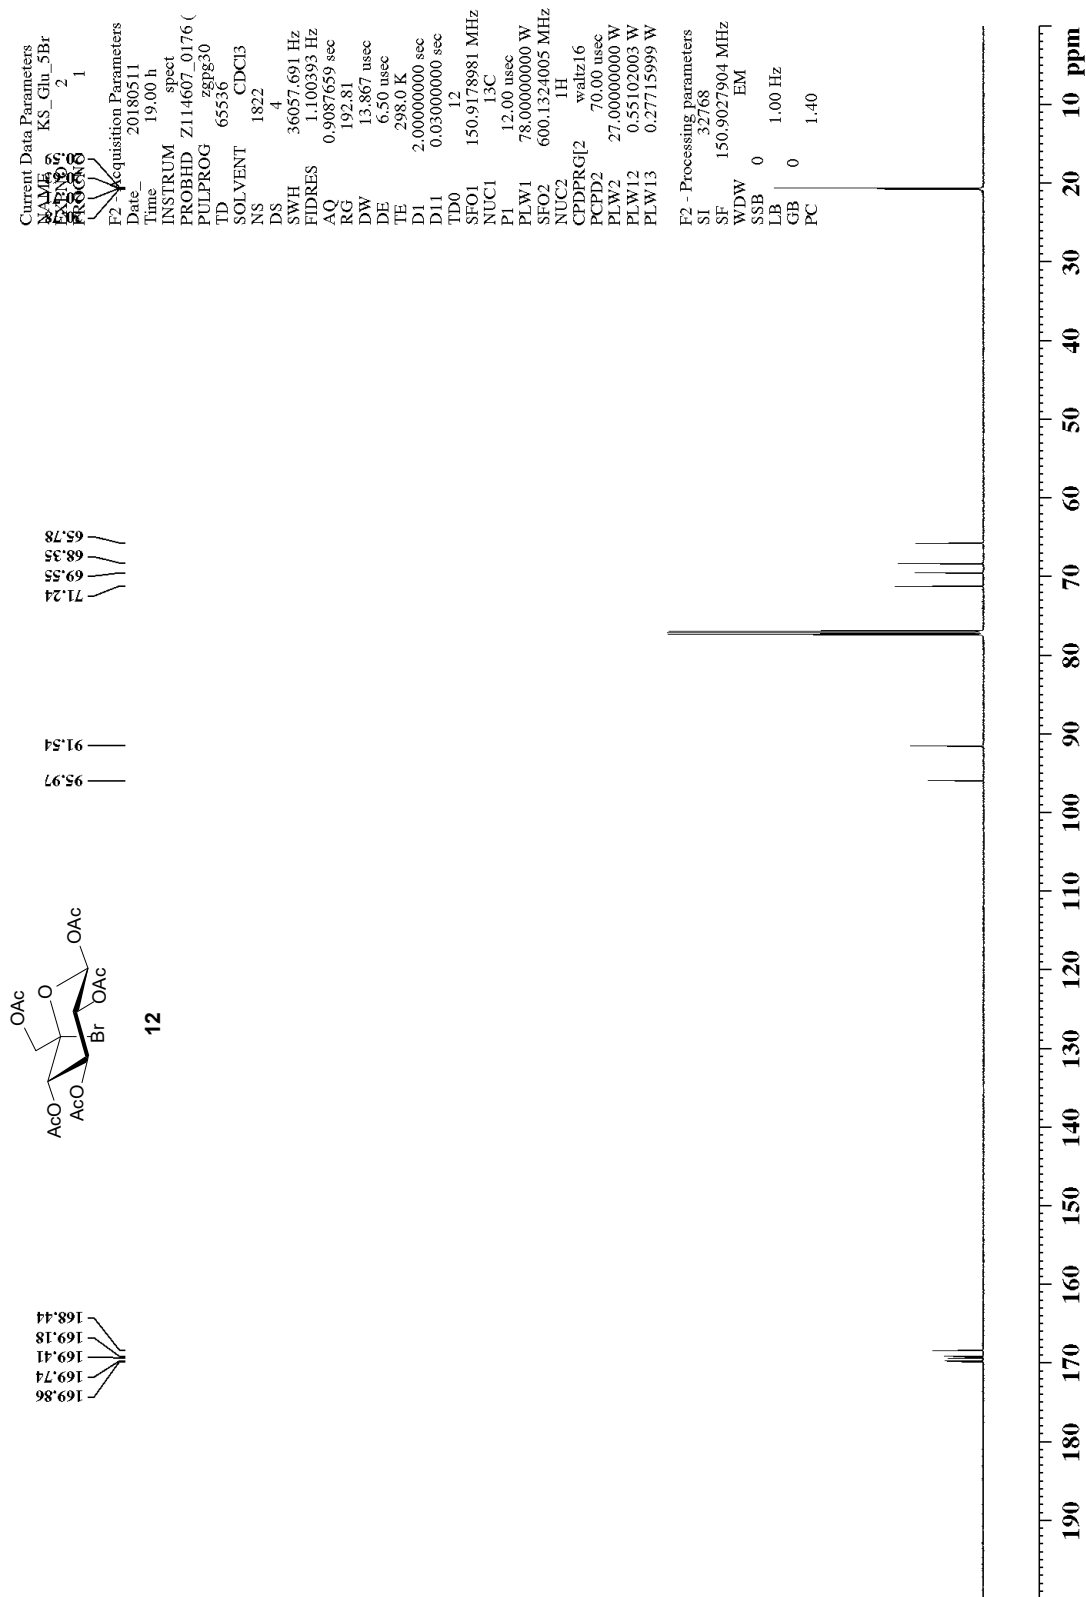

# <sup>1</sup>H NMR spectrum of Compound 13

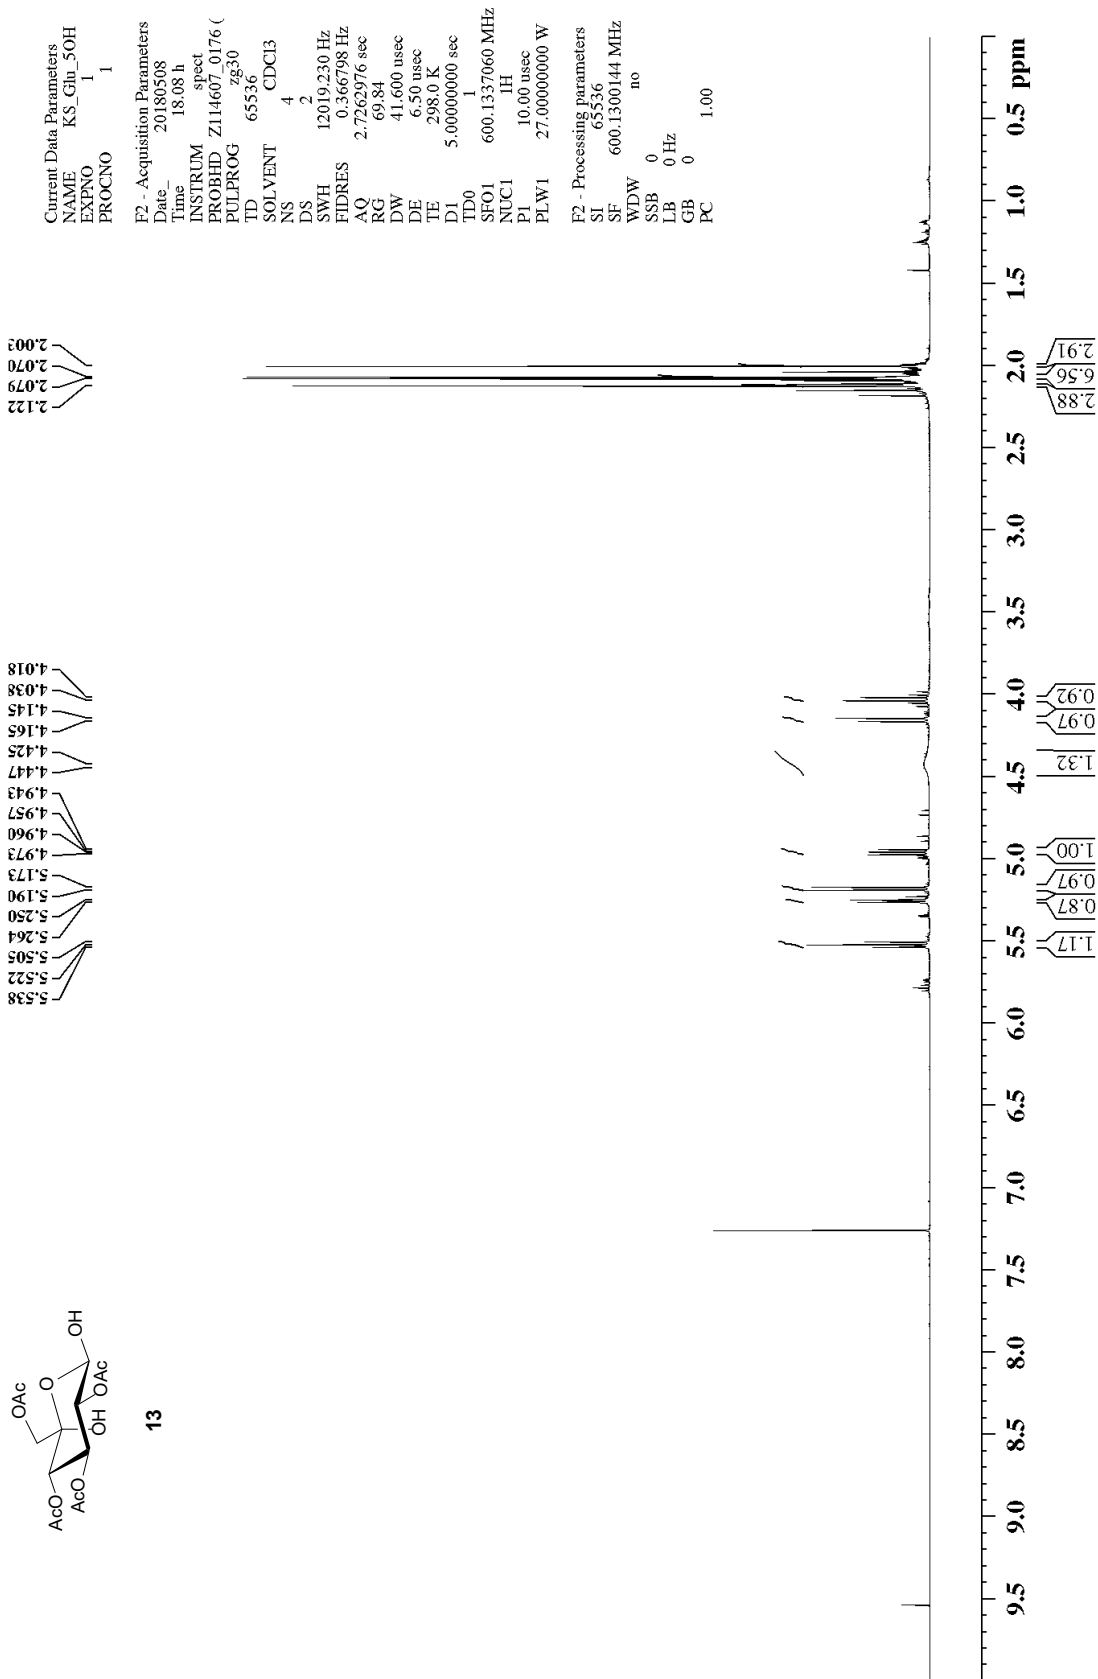

# <sup>13</sup>C NMR spectrum of Compound 13

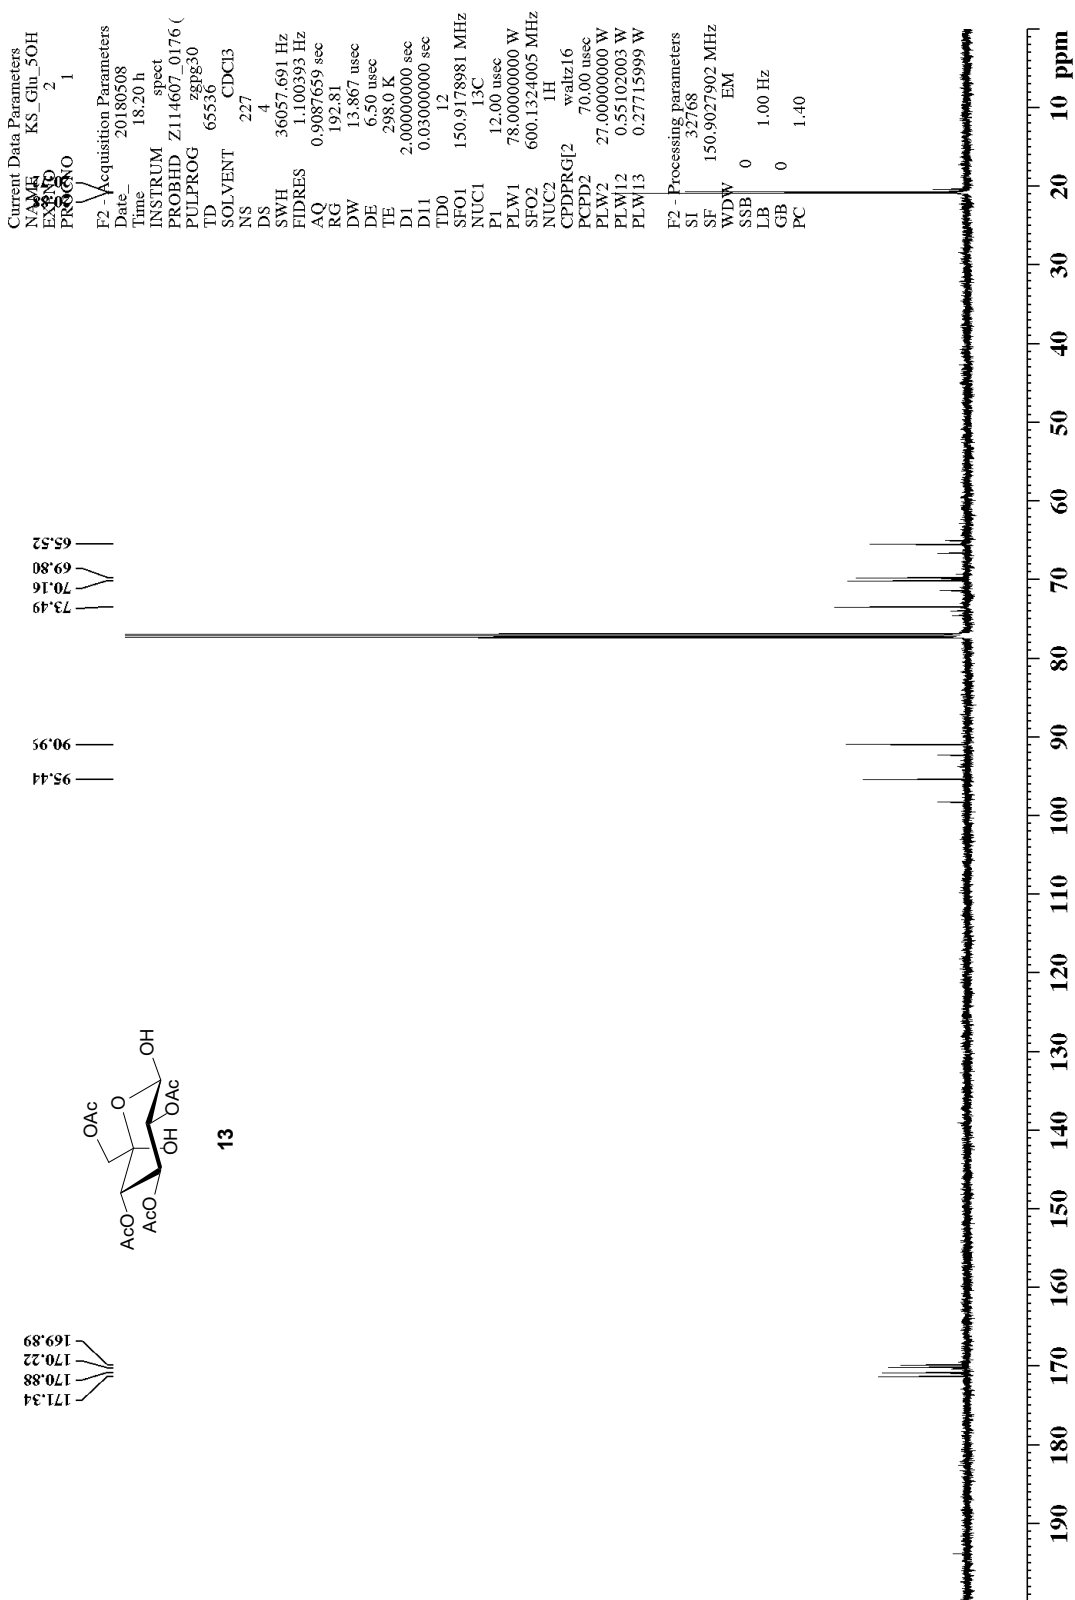

# <sup>1</sup>H NMR spectrum of Compound 1

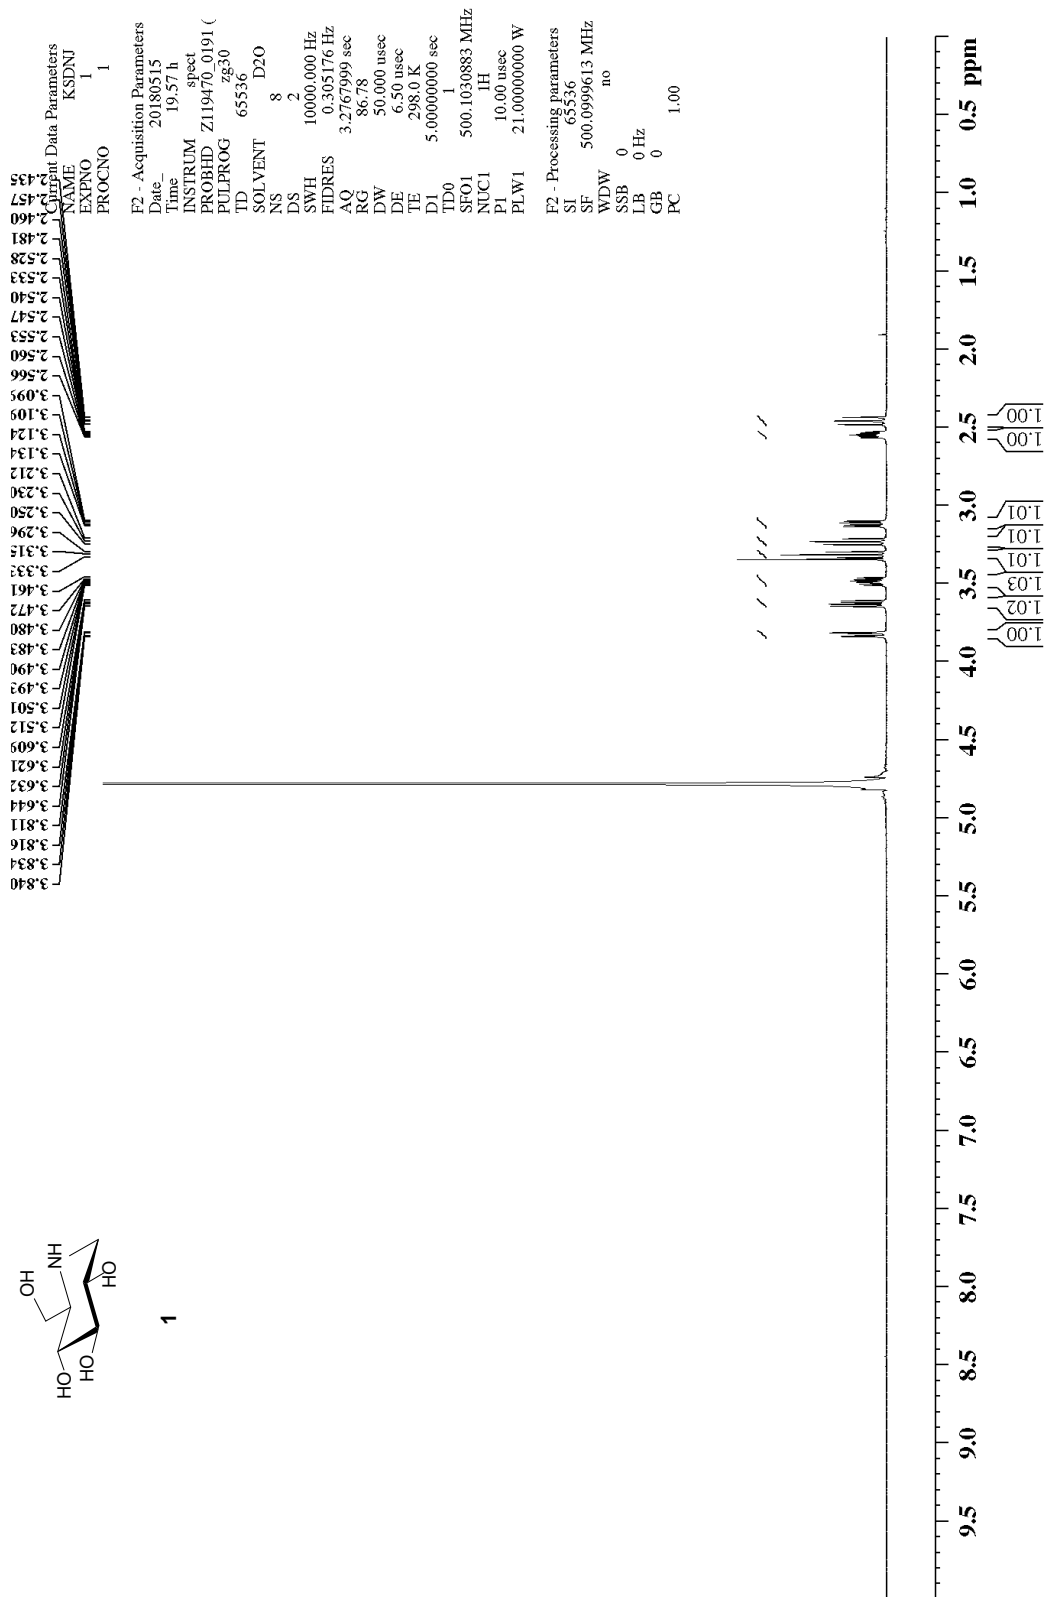

# <sup>13</sup>C NMR spectrum of Compound 1

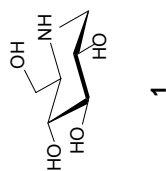

Current Data Parameters  
NAME KSDNI  
EXPNO 2  
PROCNO 1

F2 - Acquisition Parameters  
Date\_ 20180516  
Time 2.15 h  
INSTRUM spect  
PROBHD Z119470.0191 ( zpg30)  
PULPROG zgpg30  
TD 65536  
SOLVENT D2O  
NS 7200  
DS 4  
SWH 31250.000 Hz  
FIDRES 0.953674 Hz  
AQ 1.0485760 sec  
RG 188.97  
DW 16.000 usec  
DE 8.87 usec  
TE 298.0 K  
D1 2.00000000 sec  
D11 0.033000000 sec  
TD0 6  
SFO1 125.7621889 MHz  
NUC1 <sup>13</sup>C  
PI 10.00 usec  
PLW1 88.00000000 W  
SFO2 500.1025005 MHz  
NUC2 <sup>1</sup>H  
CPDPRG2 waltz16  
PCPD2 80.00 usec  
PLW2 21.00000000 W  
PLW12 0.32813001 W  
PLW13 0.16504000 W

F2 - Processing parameters  
SI 65536  
SF 125.7498925 MHz  
WDW EM  
SSB 0  
LB 1.00 Hz  
GB 0  
PC 1.40

81.10  
74.21  
73.58  
64.07  
63.23  
51.38

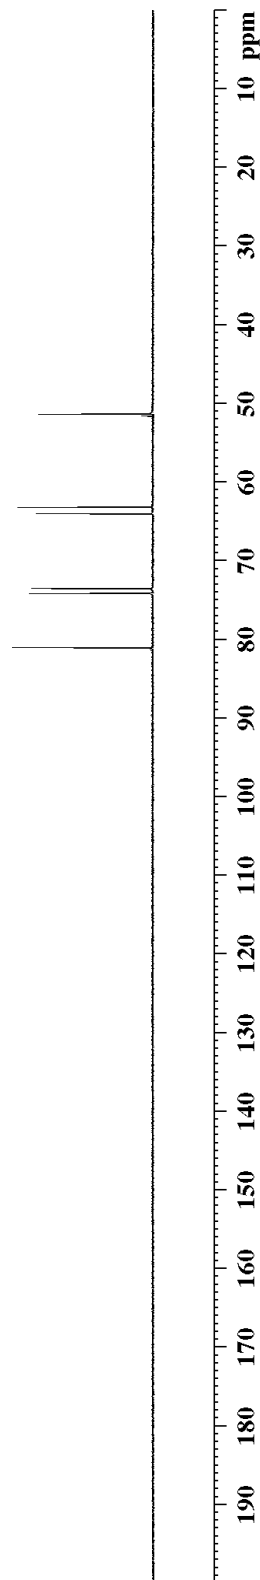



<sup>1</sup>H NMR spectrum of Compound 2

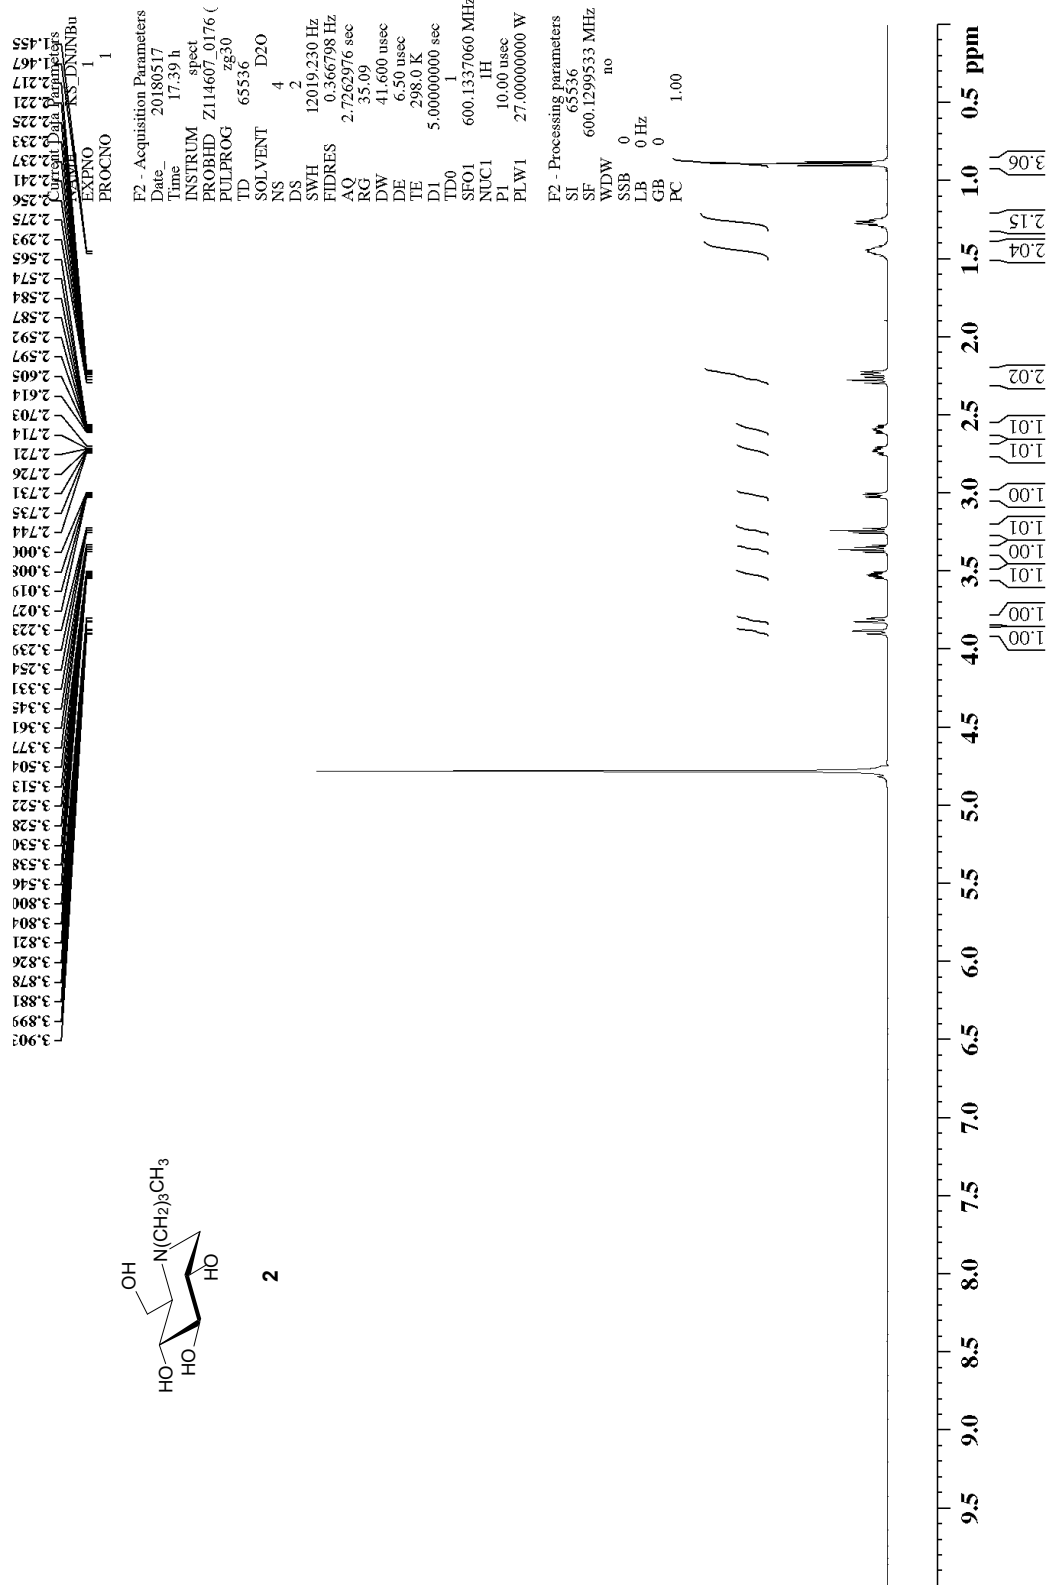

# <sup>13</sup>C NMR spectrum of Compound 2

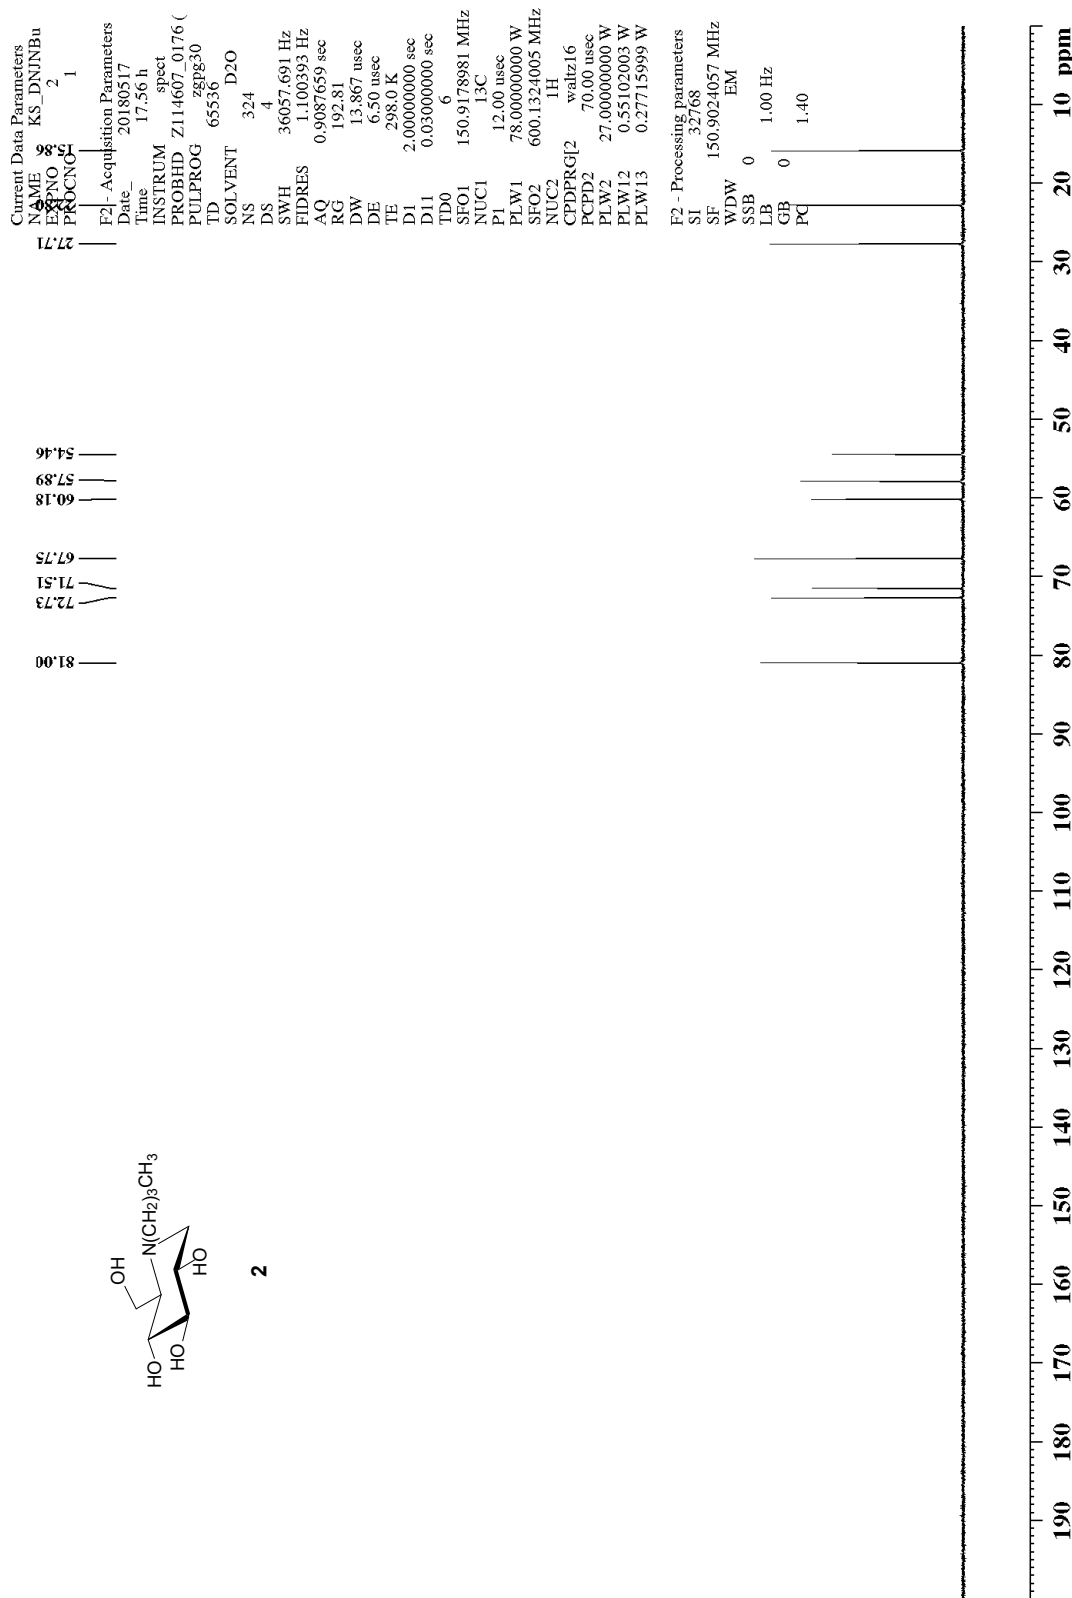

<sup>1</sup>H NMR spectrum of Compound 3

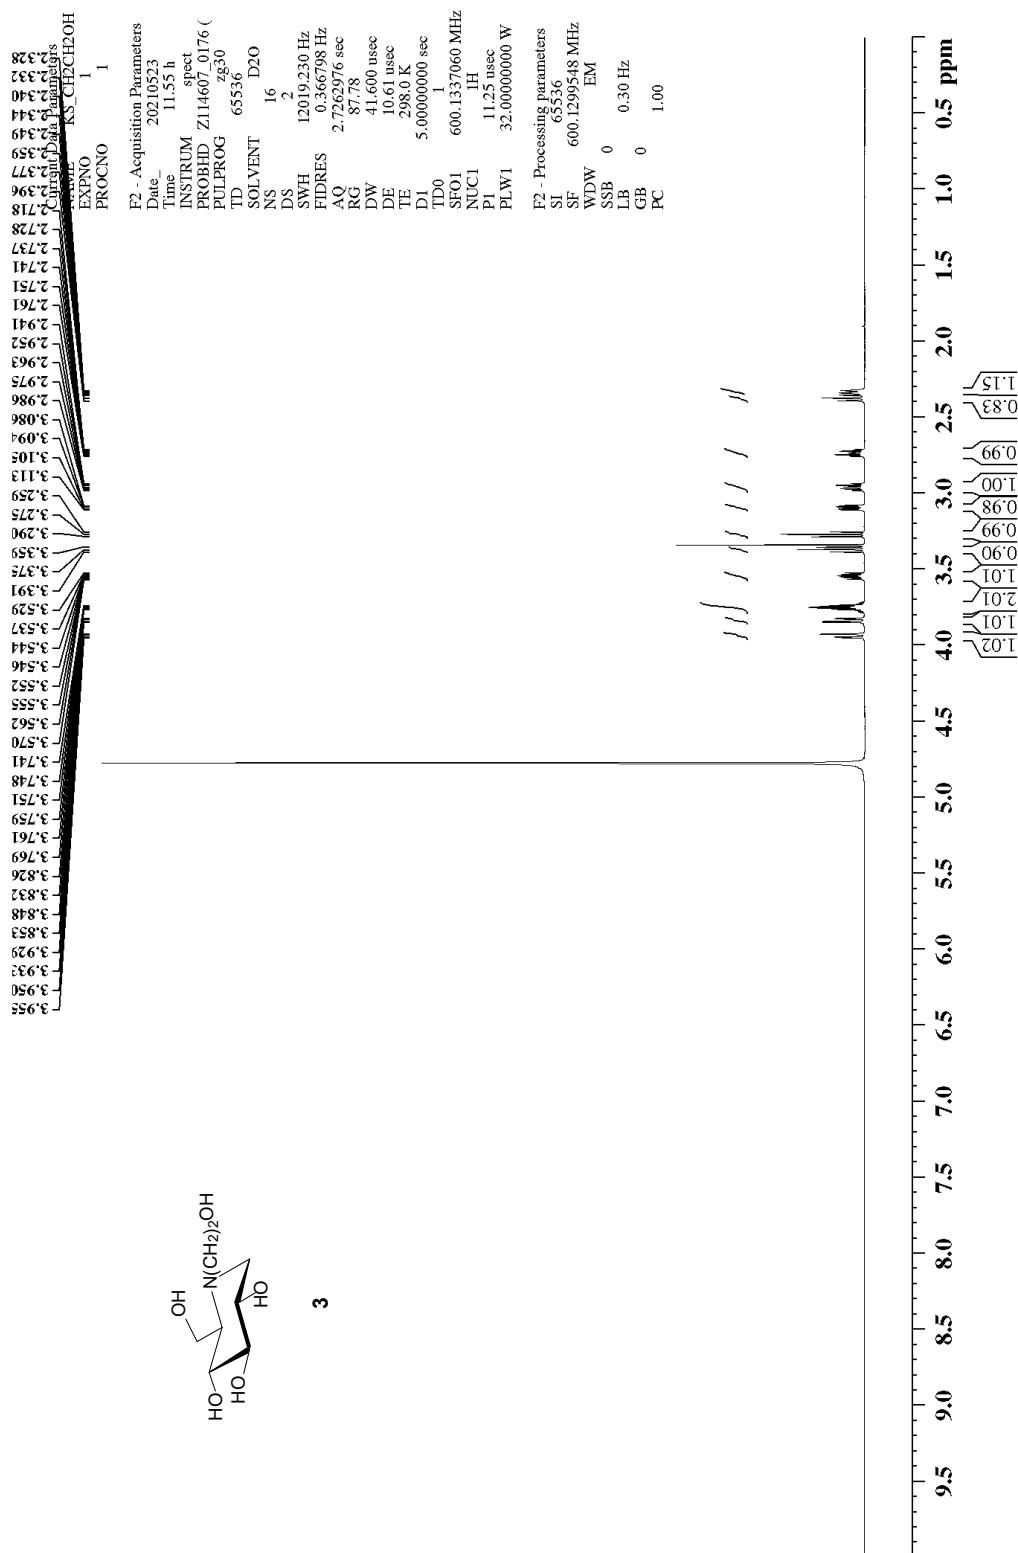

# <sup>13</sup>C NMR spectrum of Compound 3

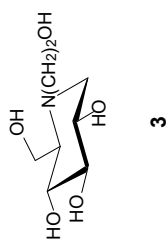

Current Data Parameters  
NAME KS\_CH2CH2OH  
EXPNO 2  
PROCNO 1

F2 - Acquisition Parameters  
Date\_ 20210523  
Time 14.01 h  
INSTRUM spect  
PROBHD Z114607\_0176 (zgpg)  
PULPROG zgpg  
TD 65536  
SOLVENT D2O  
NS 2535  
DS 4  
SWH 36057.691 Hz  
FIDRES 1.100393 Hz  
AQ 0.9087659 sec  
RG 192.81  
DW 13.867 usec  
DE 6.50 usec  
TE 298.0 K  
D1 2.00000000 sec  
D11 0.03000000 sec  
TD0 5  
SFO1 150.9178981 MHz  
NUC1 13C  
P1 11.50 usec  
PLW1 90.00000000 W  
SFO2 600.1324005 MHz  
NUC2 1H  
PCPDPRG2 waltz16  
PCPD2 70.00 usec  
PLW2 28.00000000 W  
PLW12 0.46285999 W

F2 - Processing parameters  
SI 32768  
SF 150.9027094 MHz  
WDW EM  
SSB 0  
LB 1.00 Hz  
GB 0  
PC 1.40

78.87  
70.55  
69.33  
66.21  
58.49  
58.18  
56.67  
53.43

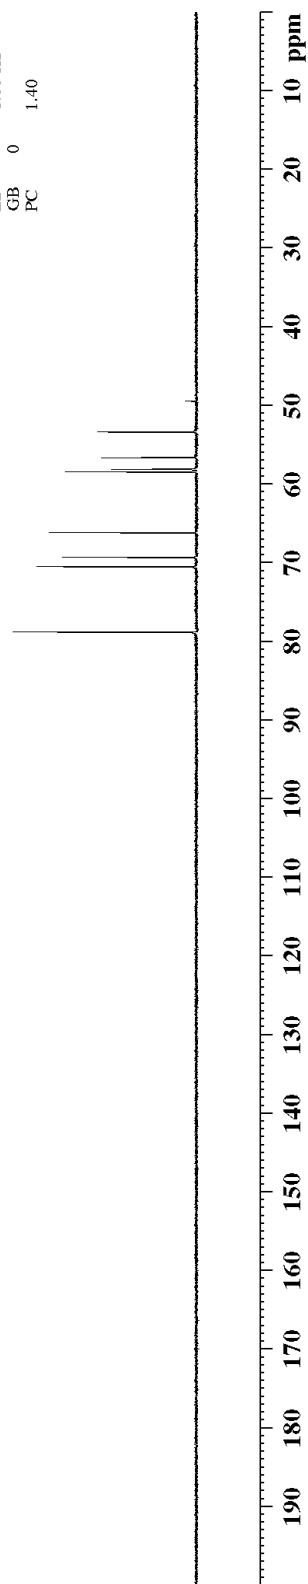

# <sup>1</sup>H NMR spectrum of Compound 18

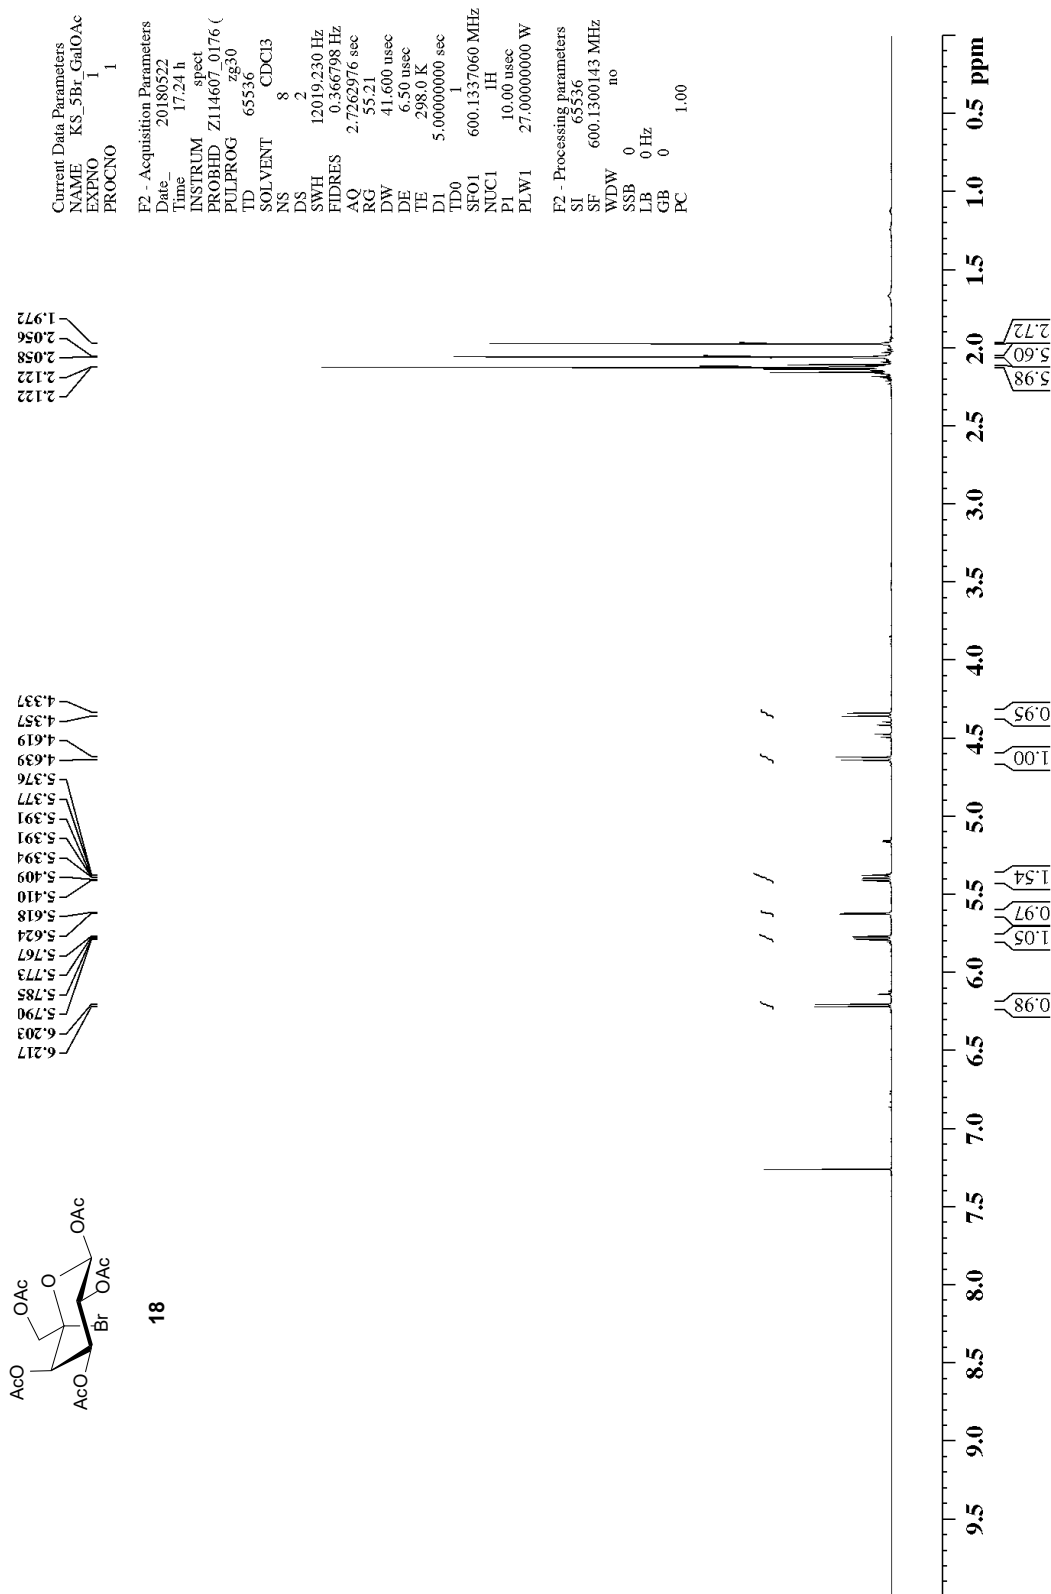

# <sup>13</sup>C NMR spectrum of Compound 18

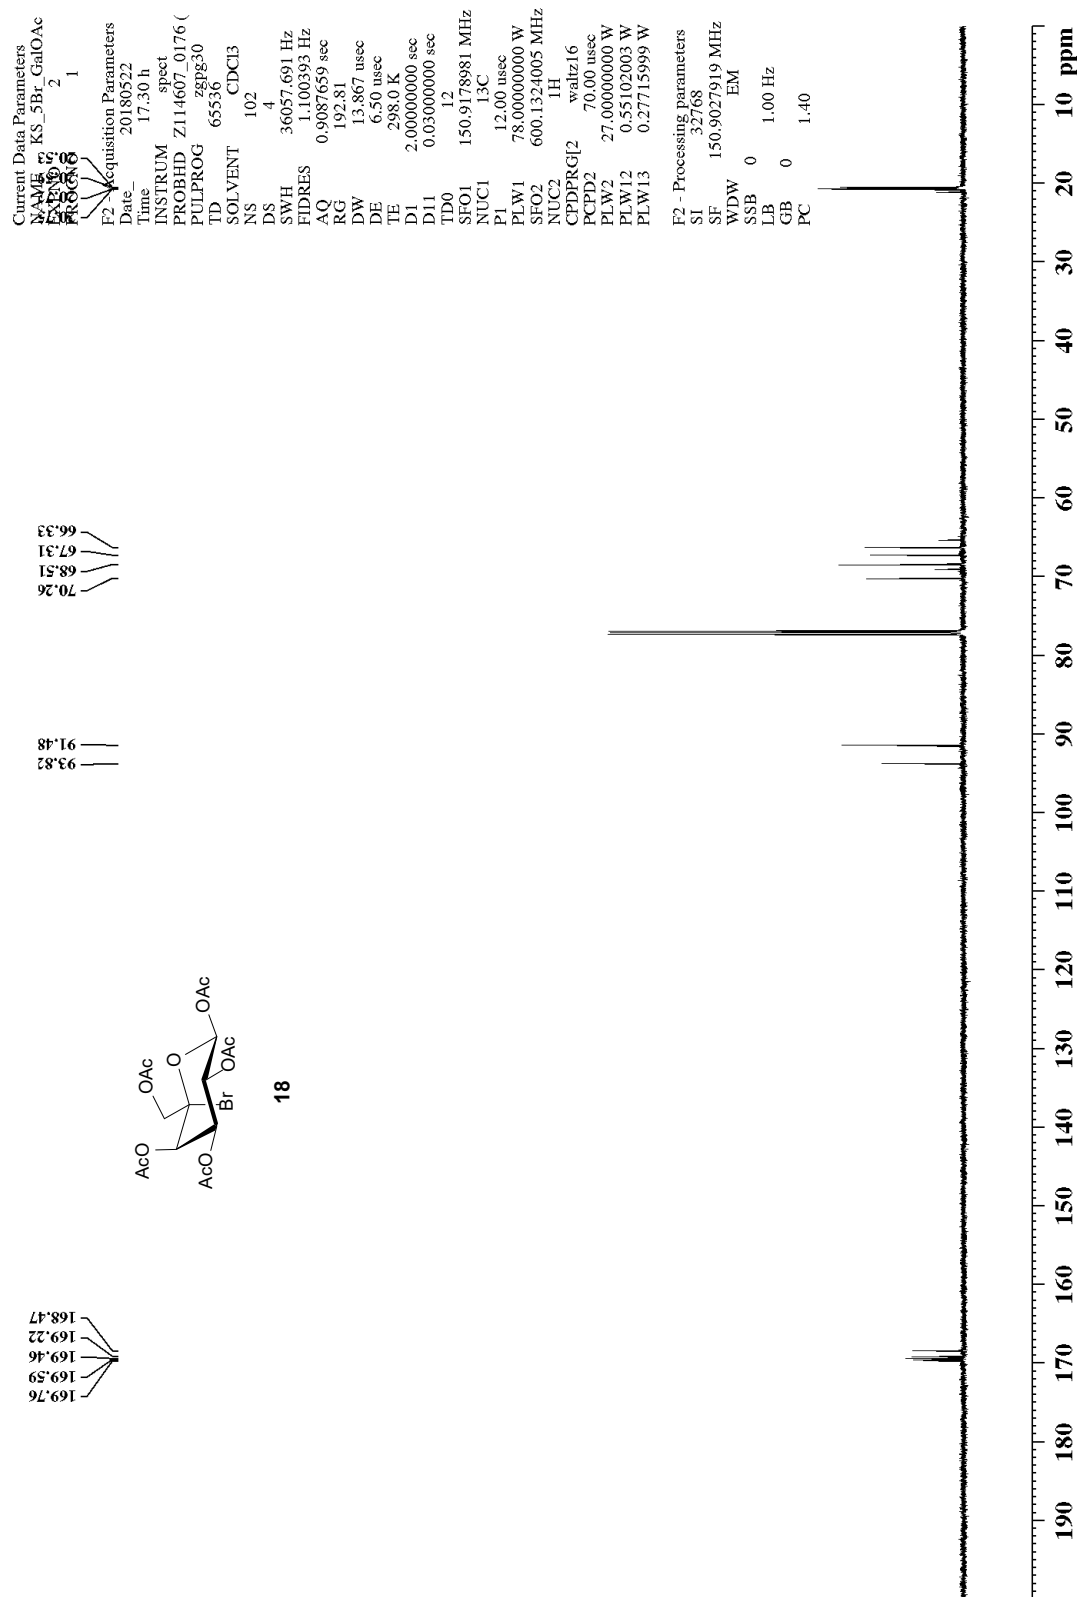

# <sup>1</sup>H NMR spectrum of Compound 19

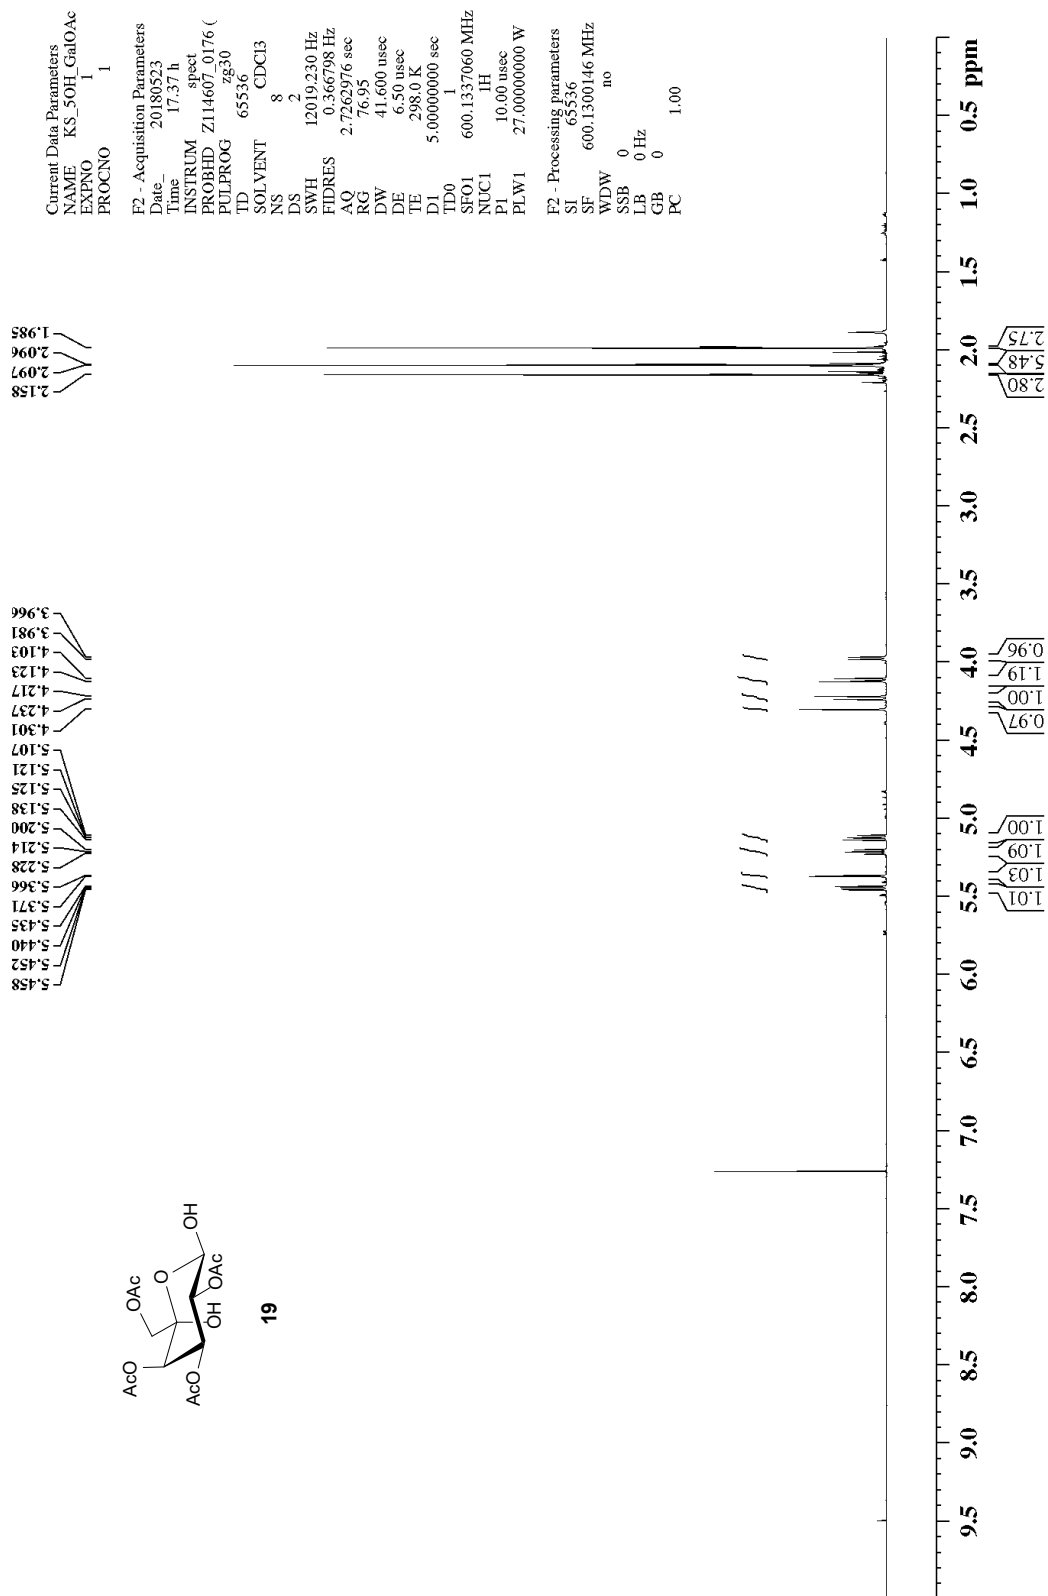

# <sup>13</sup>C NMR spectrum of Compound 19

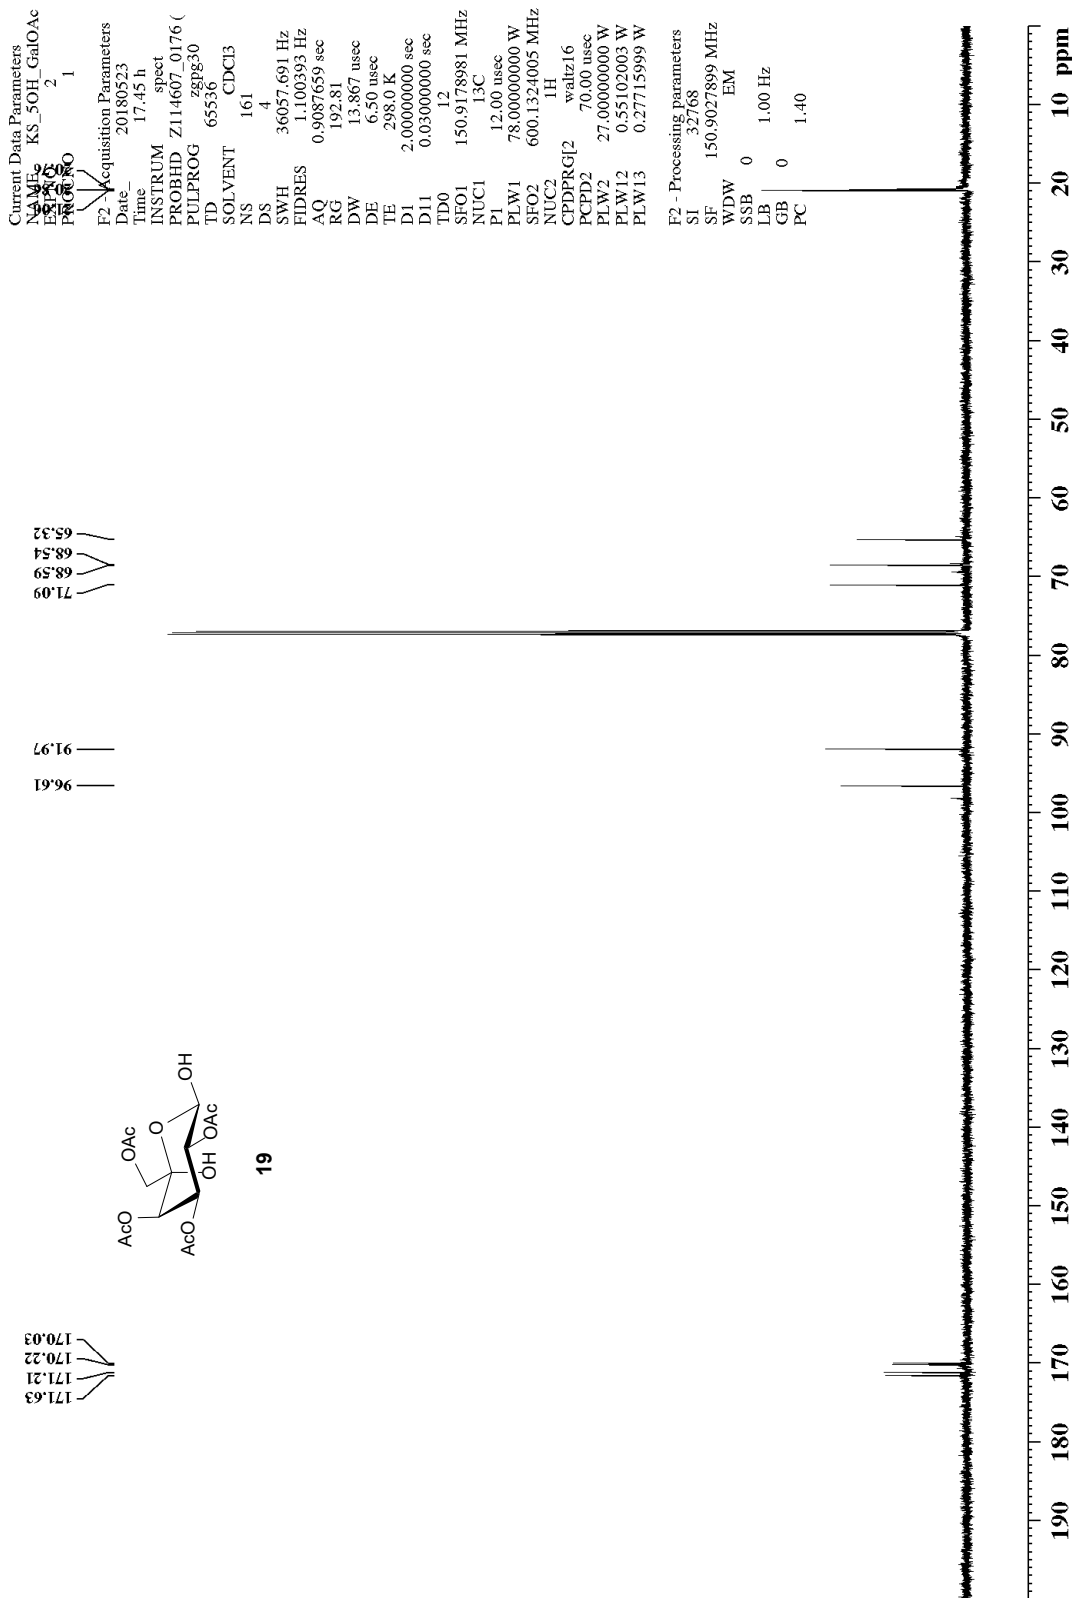



# <sup>1</sup>H NMR spectrum of Compound 5

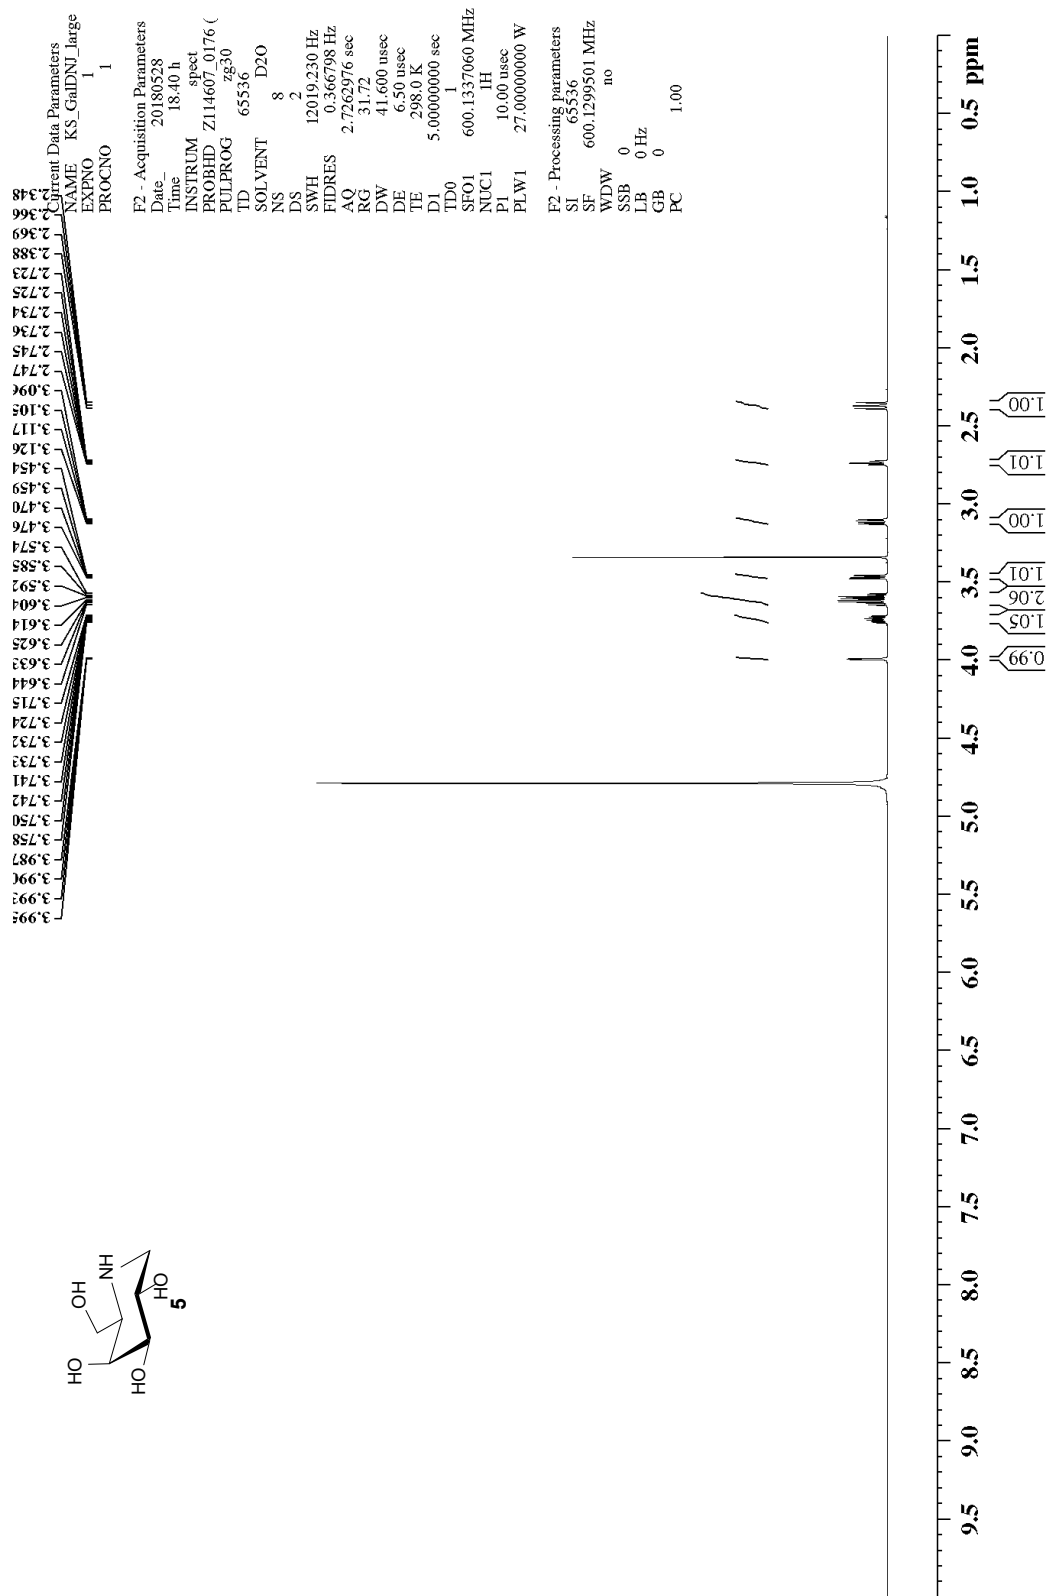

# <sup>13</sup>C NMR spectrum of Compound 5

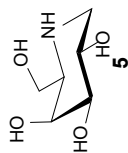

Current Data Parameters  
NAME KS\_GalDNJ\_large  
EXPNO 2  
PROCNO 1

F2 - Acquisition Parameters  
Date\_ 20180528  
Time 18.46 h  
INSTRUM spect  
PROBHD Z114607\_0176 (zpg30)  
TD 65536  
SOLVENT D2O  
NS 105  
DS 4  
SWH 36057.691 Hz  
FIDRES 1.100393 Hz  
AQ 0.9087659 sec  
RG 192.81  
DW 13.867 usec  
DE 6.50 usec  
TE 298.0 K  
D1 2.00000000 sec  
D11 0.03000000 sec  
D12  
D13  
SFO1 150.9178981 MHz  
NUC1 13C  
P1 12.00 usec  
PLW1 78.00000000 W  
SFO2 600.1324005 MHz  
NUC2 1H  
CPDPRG2 waltz16  
PCPD2 70.00 usec  
PLW2 27.00000000 W  
PLW12 0.55102003 W  
PLW13 0.27715999 W

F2 - Processing Parameters  
SI 32768  
SF 150.9027092 MHz  
WDW 0  
SSB 0  
LB 1.00 Hz  
GB 0  
PC 1.40

75.66  
69.86  
68.77  
61.99  
59.42  
49.66

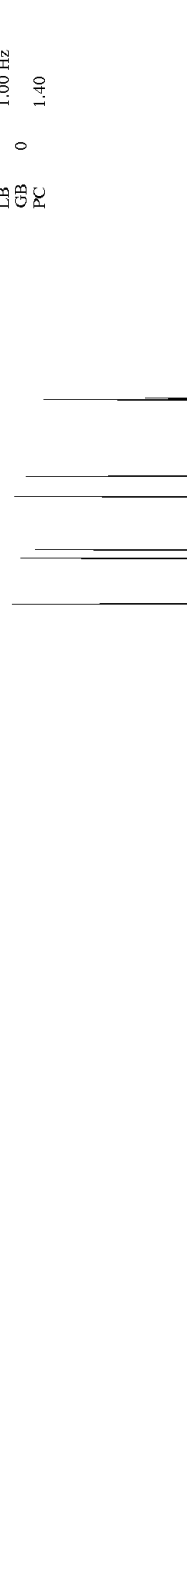

190 180 170 160 150 140 130 120 110 100 90 80 70 60 50 40 30 20 10 ppm

# <sup>1</sup>H NMR spectrum of Compound 1-Azido-9-methoxynonane

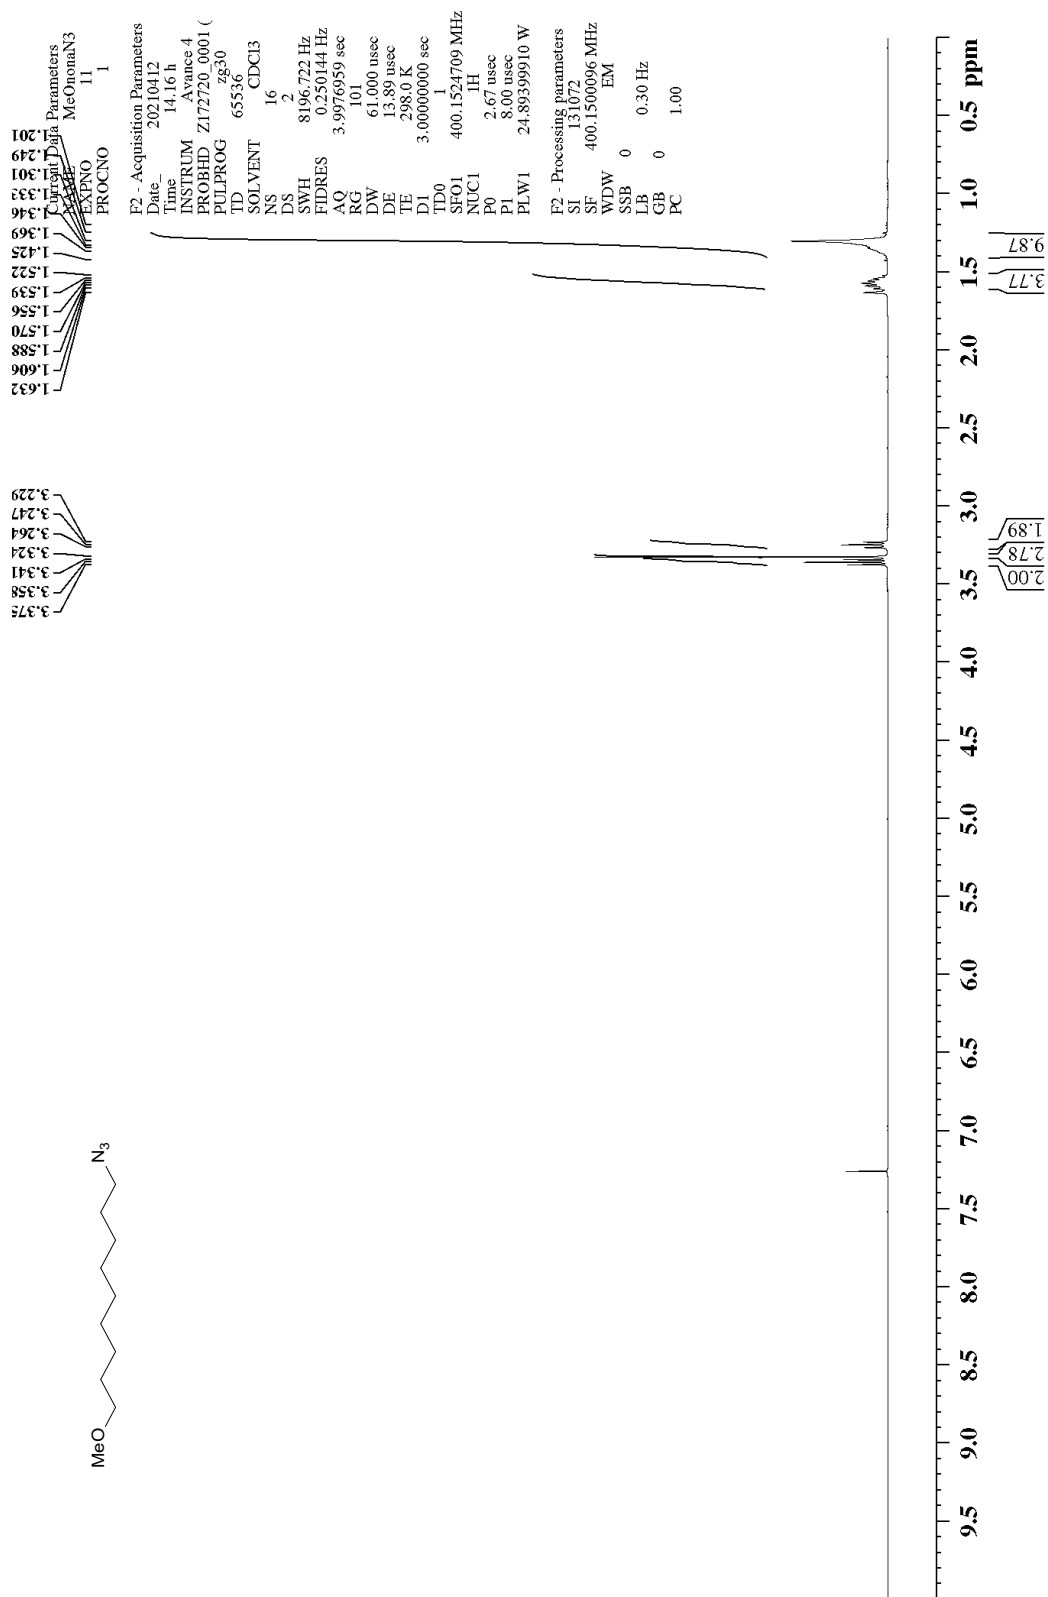

# <sup>13</sup>C NMR spectrum of Compound 1-Azido-9-methoxynonane

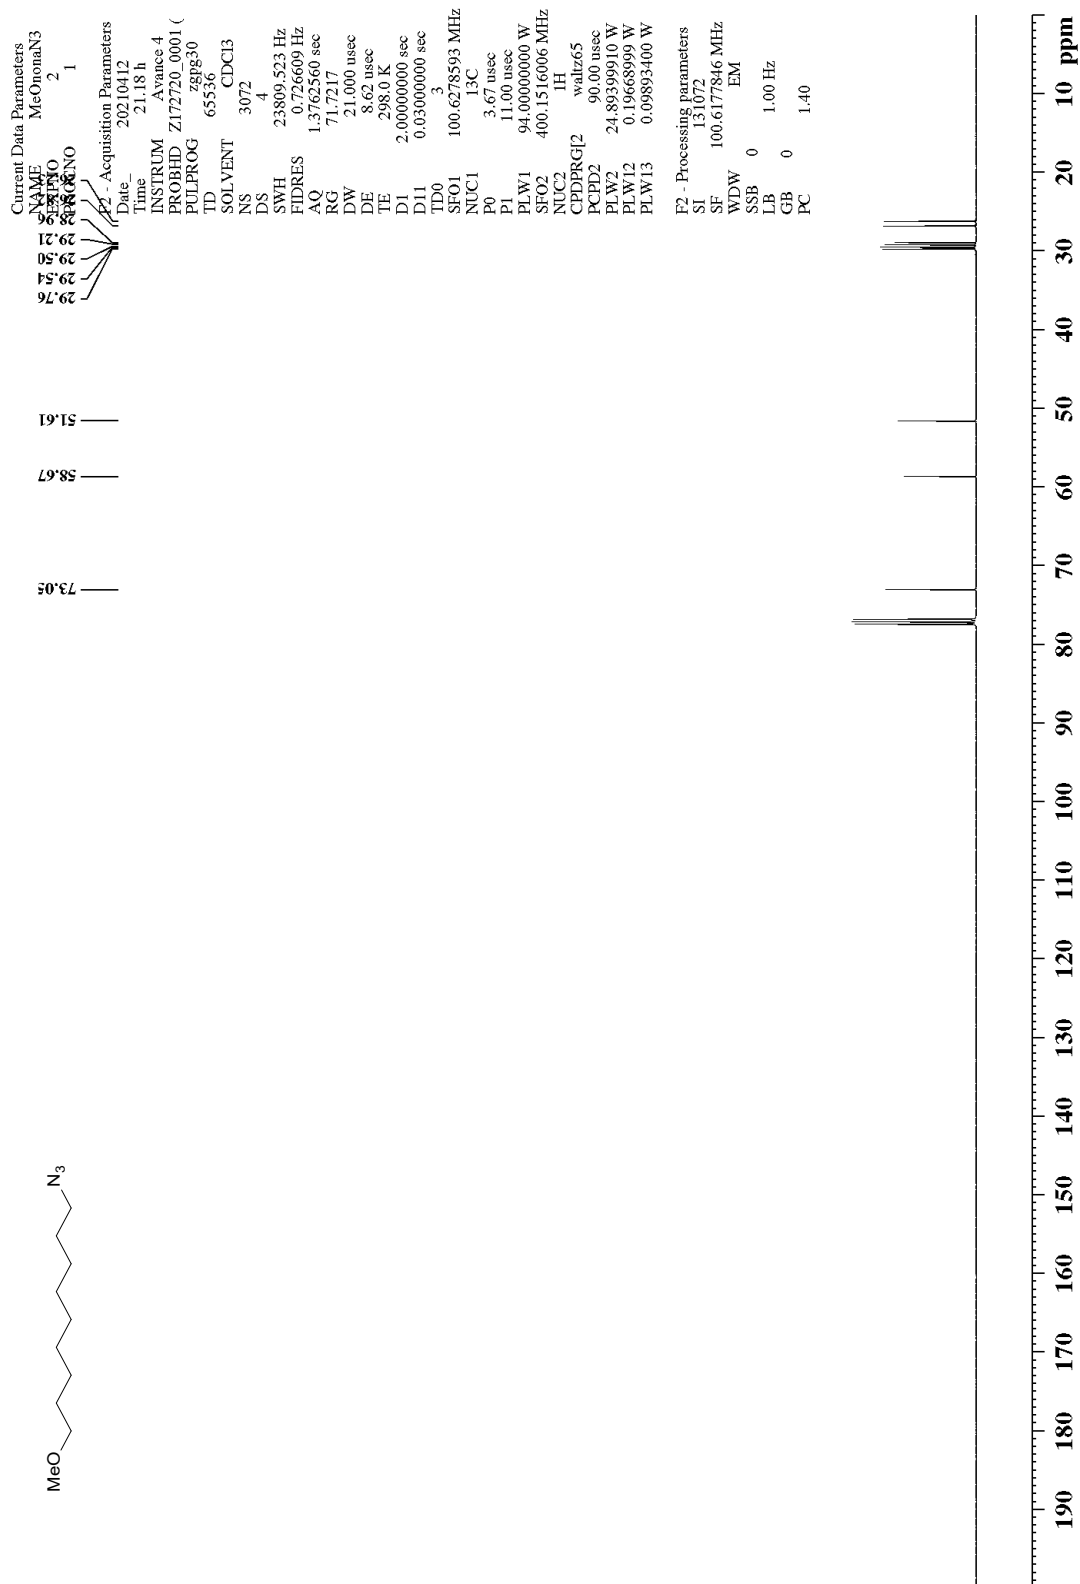

# <sup>1</sup>H NMR spectrum of Compound 1-Amino-9-methoxynonane

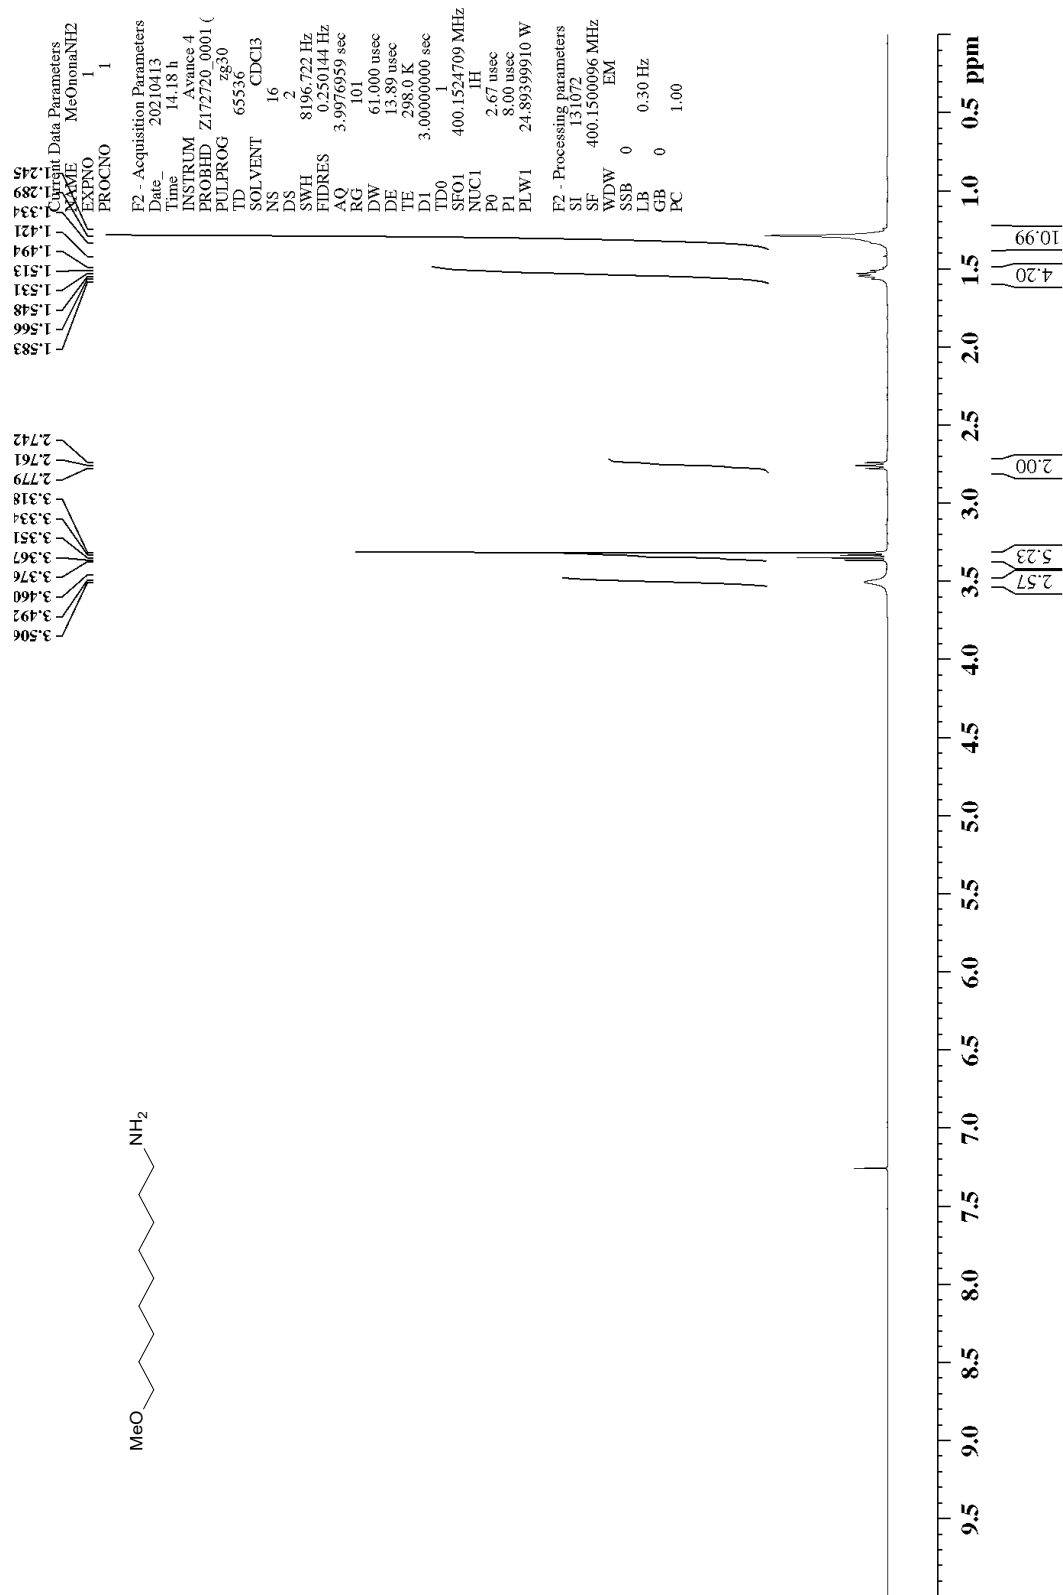



# <sup>1</sup>H NMR spectrum of Compound 4

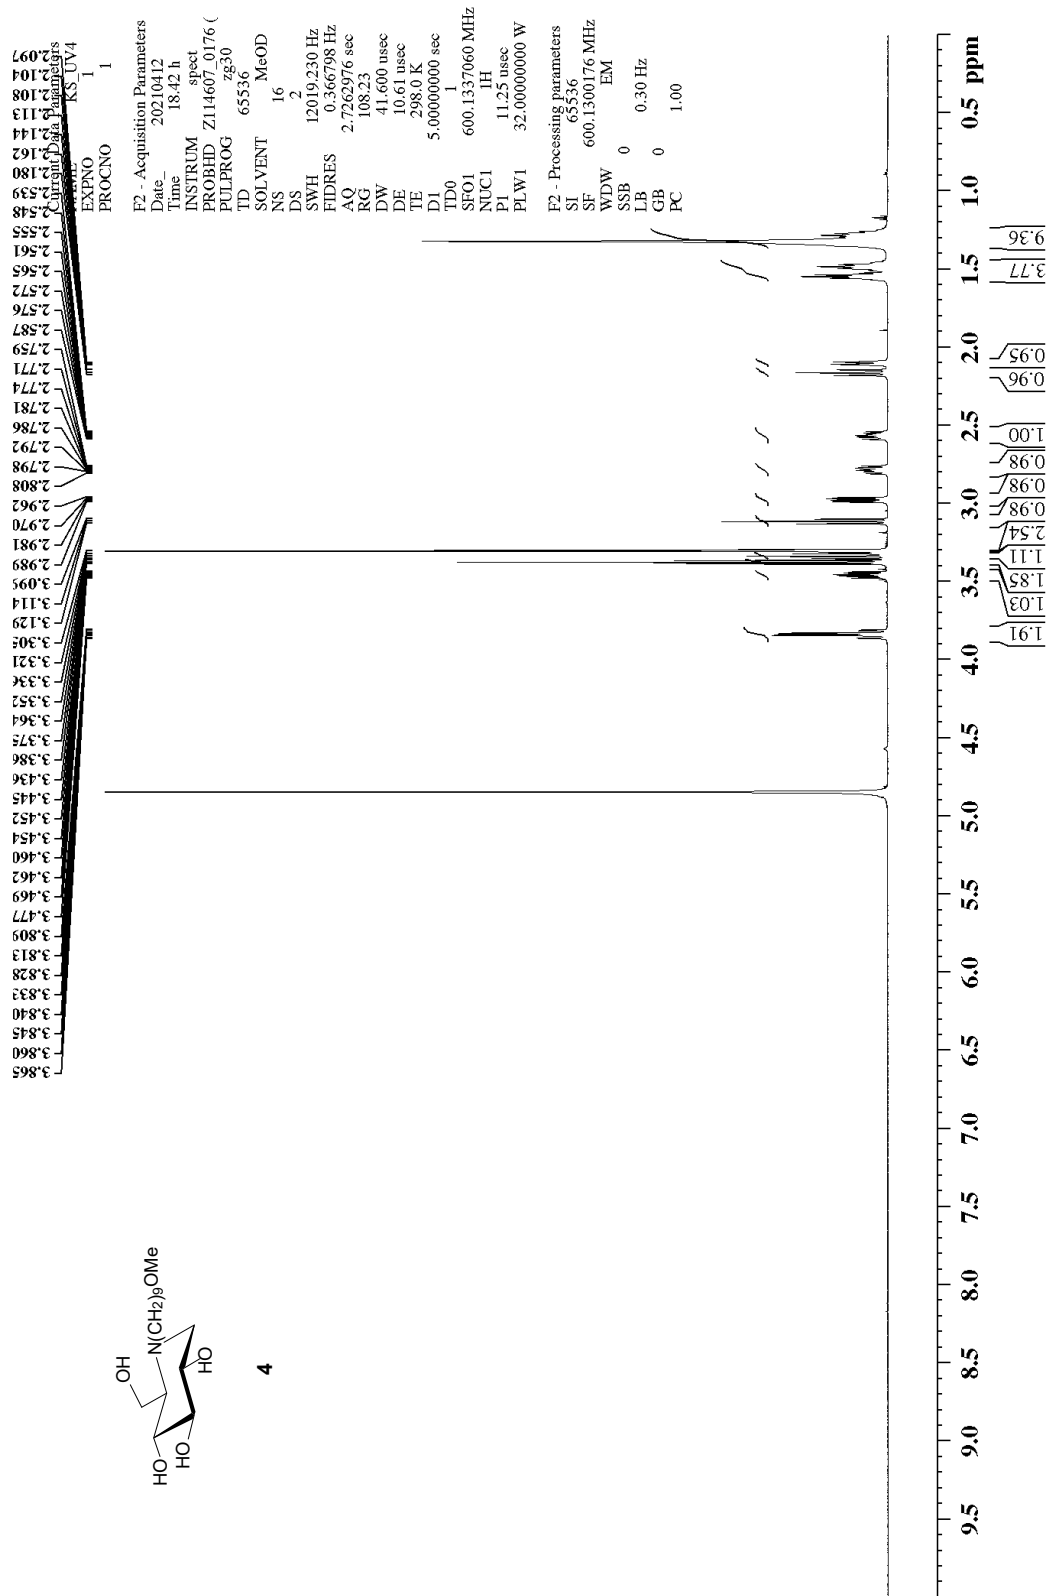

# <sup>13</sup>C NMR spectrum of Compound 4

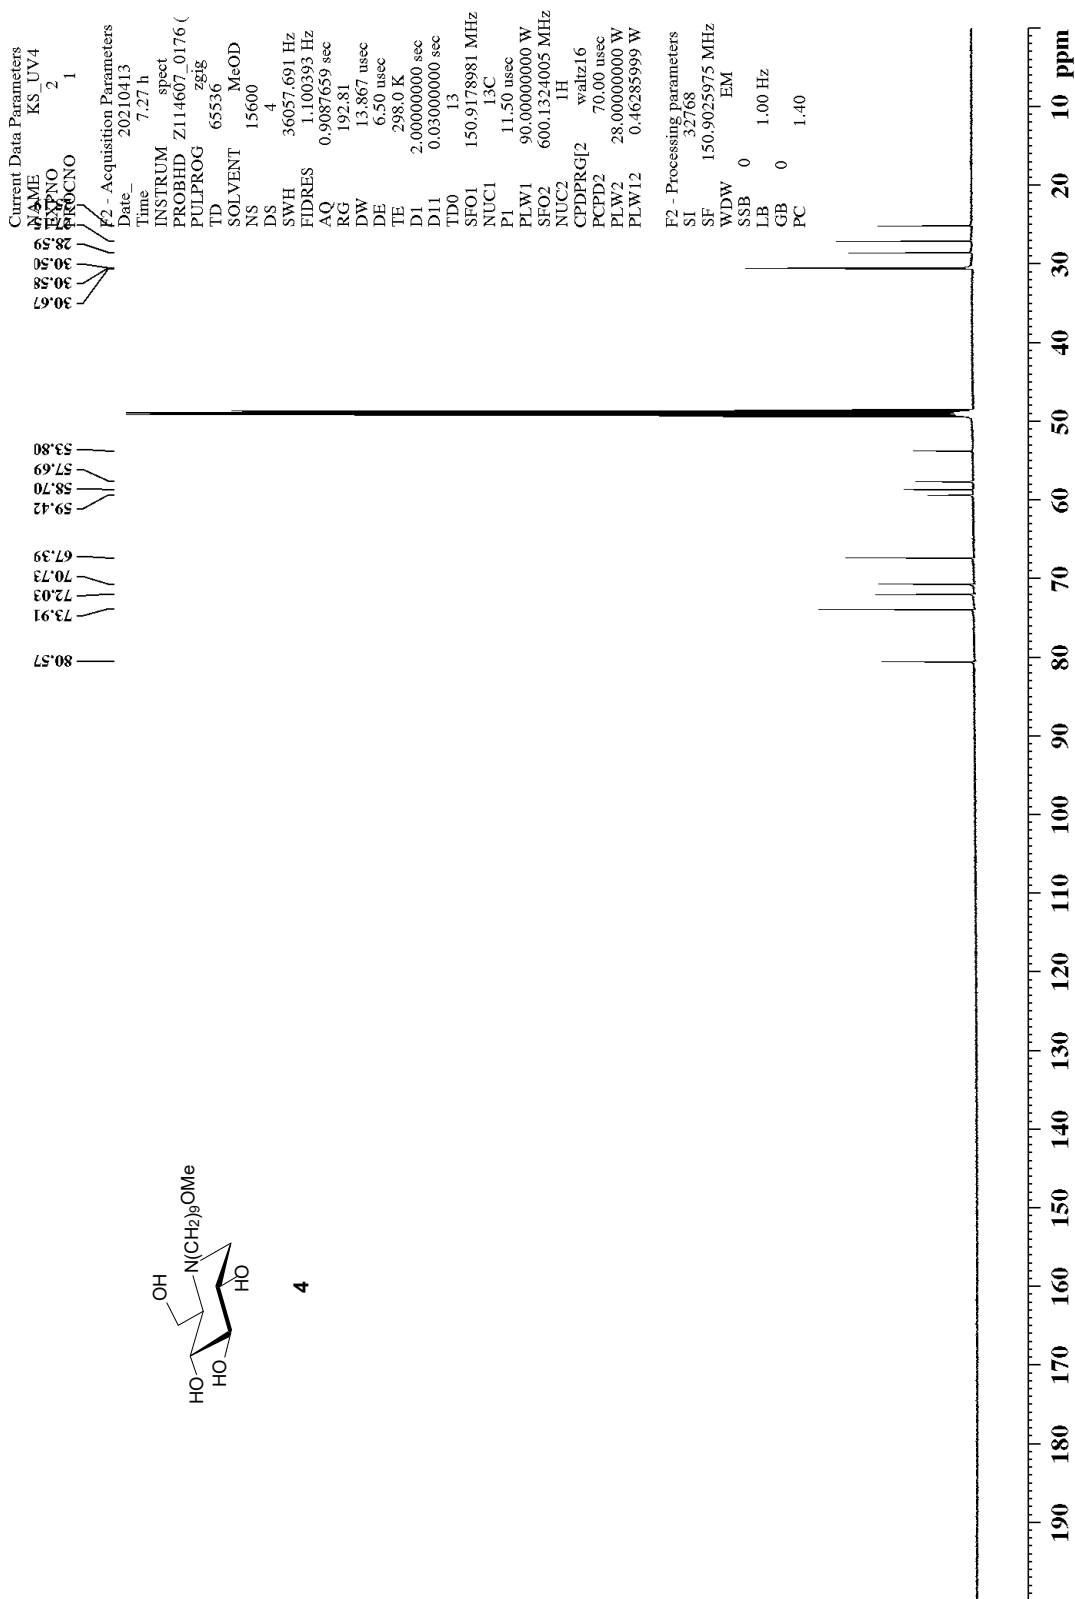

Supplement: d2ra04409a1.pdf [file d2ra04409a1.pdf]
